# Supplementary material for: “The trust is gone”: Smallholder poultry producers’ perceptions of biosecurity measures against highly pathogenic avian influenza
Source: Research Square preprint supplement (doi:10.21203/rs.3.rs-8254317/v1), 2025-12-10
Supplement: Supplementary file 1 [file d491fd4a0a802cdecf0c712b.docx]

**Appendix 1. Interview Guide for Health Belief Model-guided Smallholder Producer Study**

Hello, thank you for talking with me today. My name is Cassandra Andrew, and I am hoping to speak with you today about your experiences with biosecurity and avian influenza as a small flock poultry owner or producer. This conversation should take up to one hour of your time. I wanted to remind you that you can choose to skip any questions that I ask and that you can ask to stop the interview at any time with no consequences.

Could you confirm that you received a copy of the consent form? (Reiterated components of consent form if participants could not recall signing)

Did you have any questions about anything?

Can I confirm that you consent to participate in this interview?

And, are you okay with me audio- and video- (interview only) recording this conversation?

Note: As these are semi-structured interviews, questions may deviate or change based on interviewee responses.

**General Questions (iteratively added/adapted)**

Where are you located?

Why do you keep poultry? (Self-identity)

How many and what type of birds do you have now and usually keep?

Where do you get information about poultry health?

Do you have preferences about where to get this information, or are there places where you would like to see more?

Tell me what you know about avian influenza.

Tell me what you know about biosecurity and what methods of biosecurity you are using right now (and/or CA defines biosecurity)

**Questions About Perceived Benefits**

1. Describe what you believe are the benefits to you, your animals, and your family of doing biosecurity.
2. Regardless of feasibility, what factors would motivate you to change your biosecurity; prompts: benefit a nearby commercial farm and the provincial/territorial economy, family’s health, etc.
3. How important is avoiding avian influenza to you and why?
4. How important is avian influenza to you relative to everything else you are dealing with in your life?

**Questions About Perceived Barriers**

1. What barriers do you face in putting biosecurity measures in place?

**Questions About Perceived Susceptibility**

1. Do you feel that your flock is at risk of contracting avian influenza?
2. Do you feel that your family is at risk of contracting avian influenza?

**Questions About Perceived Severity**

1. If your flock gets influenza, what are the impacts on others?

*Prompt:* What do you think would be the consequence(s)? Who would bear those consequences?

1. Does the fact that larger (i.e. commercial farms) may be affected by your actions change your motivation to put avian influenza biosecurity measures in place? Why or why not?
   - Clarification: does the fact that there could be spread from your flock to another nearby (commercial) impact your motivation to put avian influenza biosecurity measures in place?
   - Only asked in cases when commercial flocks were nearby after being asked: “Are there any commercial farms near you?”
2. What do you think might be some of the long-term consequences to small flock owners if there are repeated outbreaks involving small-scale flocks?

**Questions About Cue to Action**

1. What kind or source information might inspire you to enact biosecurity measures?

*Prompt:* What about (*this source*)?

1. Who do you view as trustworthy source about biosecurity?

*Prompt:* when it comes to how and when to enact biosecurity?

**Questions About Self-efficacy**

1. What supports would you have if you did have an outbreak?
2. Do you feel you have the ability to prevent avian influenza? Why or why not?
3. How much time, money, and energy are you willing to invest now at maintaining a level of biosecurity even in the absence of an outbreak (compared to only when you get a notification of avian influenza in your region)?

**Questions About Self-identity**

1. Why do you keep poultry? (See above)
2. Who has what role in implementing and maintaining small flock biosecurity, particularly in relation to avian influenza?

Do you have any other comments you would like to share now that you are familiar with the themes of the research, or any questions for me?

Would you like to receive a copy of the research results?
